# Supplementary material for: RAD51, XRCC3, and XRCC2 mutation screening in Finnish breast cancer families
Source: PubMed Central journal article supplement (PMC4404470; doi:10.1186/s40064-015-0880-3), 2015-02-24
Supplement: 40064_2015_880_MOESM1_ESM.pdf [file 40064_2015_880_MOESM1_ESM.pdf]

## ***RAD51*, *XRCC3*, and *XRCC2* mutation screening in Finnish breast cancer families**

Liisa M. Pelttari, Johanna I. Kiiski, Salla Ranta, Sara Vilske, Carl Blomqvist, Kristiina Aittomäki, Heli Nevanlinna

**Corresponding author:** Heli Nevanlinna, Department of Obstetrics and Gynecology, University of Helsinki and Helsinki University Hospital, [heli.nevanlinna@hus.fi](mailto:heli.nevanlinna@hus.fi)

### **Supplementary Material**

**Supplementary Table 1.** Primers and PCR conditions for the sequencing of the *RAD51*, *XRCC3*, and *XRCC2* genes.

| <b>Gene</b>  | <b>Amplicon</b> | <b>Length (bp)</b> | <b>Forward primer</b>  | <b>Reverse primer</b>    | <b>Temp (C°)</b> |
|--------------|-----------------|--------------------|------------------------|--------------------------|------------------|
| <i>RAD51</i> | 5'UTR-ex1       | 540                | TTACGCAAAAAGGGAAGAGG   | GTCCGGGTTTCACACTGC       | 58               |
| <i>RAD51</i> | ex2             | 443                | GGCCCCTACACTGAAGGAAT   | GGCCCTGCCAGACATATTTA     | 55               |
| <i>RAD51</i> | ex3             | 398                | CCAAGGATTTCAAGGGACAG   | GGTAACAGTCACCCCTGGAA     | 55               |
| <i>RAD51</i> | ex4             | 526                | CCCATTGCACACCTTGTTTT   | TGCACCTACAGGGATTACAGG    | 55               |
| <i>RAD51</i> | ex5             | 288                | ATCGCTTGTTGGAAATTGAA   | GATGCTTGCAAATAGCAGGA     | 55               |
| <i>RAD51</i> | ex6             | 274                | TGTCATGAGGAGCTTGGTCA   | TTGGGACGTGGGGTTATAGA     | 58               |
| <i>RAD51</i> | ex7             | 370                | TGGGTGCTATCATCTCTCTGC  | GCCATTACAAGATTCAGGGAAG   | 58               |
| <i>RAD51</i> | ex8             | 253                | TGGTAAGGAAGGGACCAGAA   | CTGGAATTCACAGCCACTGA     | 58               |
| <i>RAD51</i> | ex9             | 421                | GCAGCATTAAAGGCTTTTGGA  | ACAGGGGAGAGGCATATCAA     | 58               |
| <i>RAD51</i> | ex10            | 416                | AAATGGATTCTGCCAGGTTG   | TTTCCCGGAAGCTTTATCCT     | 58               |
| <i>XRCC3</i> | ex3             | 495                | GGTAAATGTGGTGGGTTTGG   | CGCCCTCGGTTTAATAATCA     | 58               |
| <i>XRCC3</i> | ex4             | 507                | CACACTGTGTCCAGGTTTC    | ATCTTCTGACCCGATGCTGT     | 60               |
| <i>XRCC3</i> | ex5             | 467                | CTTGCTCACCCCATGAC      | AATGGTAGGAACAGCGCAAG     | 61               |
| <i>XRCC3</i> | ex6             | 345                | GTTAGAAATGGCGGGAGACA   | CTGCTGTGAGACCCCATG       | 61               |
| <i>XRCC3</i> | ex7             | 423                | GACAGTCCAAACGGGGTCT    | GGTTAGGCACAGGCTGCTAC     | 65               |
| <i>XRCC3</i> | ex8-9           | 531                | GTAGCAGCCTGTGCCTAACC   | CCAGGCAGACGCGTTTTA       | 61               |
| <i>XRCC2</i> | ex1             | 249                | AGGCCCGCACACCCTATT     | GGCCTTGTTCCCATCTCC       | 63               |
| <i>XRCC2</i> | ex2             | 378                | ACAGCACCCAGCCTAAAGTT   | TTGTCTGACACCGATGAGGA     | 63               |
| <i>XRCC2</i> | ex3a            | 485                | TGCATTTTGTAACTACCCTTG  | TCTCTAAGCACTGAGAACATTTCC | 61               |
| <i>XRCC2</i> | ex3b            | 528                | TCAATGGAGGAGAAAGTGTGAA | AGGAGGCACACATAGGAGGA     | 60               |

Bp = base pairs, Temp = annealing temperature.
